# Supplementary material for: Fire Affects Tree Growth, Water Use Efficiency and Carbon Sequestration Ecosystem Service of Pinus nigra Arnold: A Combined Satellite and Ground-Based Study in Central Italy
Source: MDPI journal article supplement (doi:10.3390/f14102033), 2023-10-11
Supplement: s1 [file s1]

Archive with 1 entries (1 files):
- forests-2622316-supplementary.pdf
