# Supplementary material for: Fire Affects Tree Growth, Water Use Efficiency and Carbon Sequestration Ecosystem Service of Pinus nigra Arnold: A Combined Satellite and Ground-Based Study in Central Italy
Source: MDPI journal article supplement (doi:10.3390/f14102033), 2023-10-11
Supplement: s1 [file s1 › forests-2622316-supplementary.pdf]

## Supplementary Materials

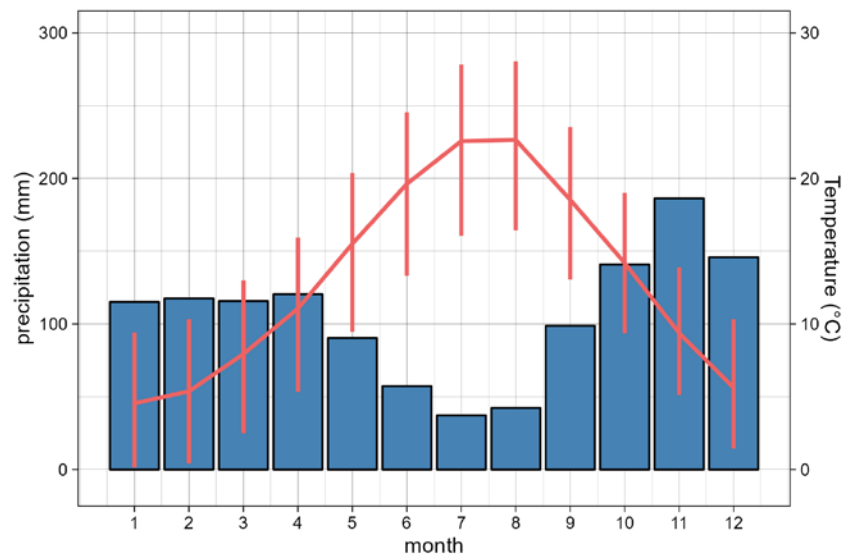

**Supplementary Figure S1.** Pluvio-thermic plot of the study area, based on the climatic data of the last 50 years. The bars represent the average precipitation of each month, while the red line represents the average temperature, there is indicated also the range between minimum and maximum.

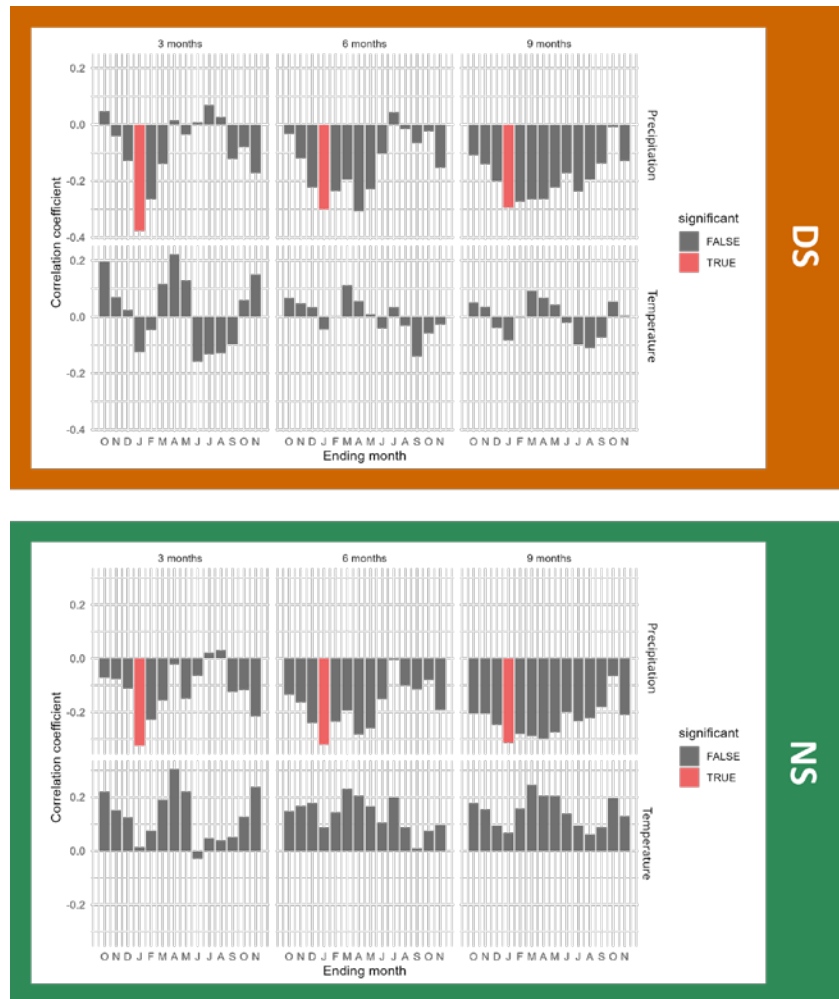

**Supplementary Figure S2.** Seasonal correlations of BAI with precipitation and temperature. Windows of length three, six and nine months were tested. On the x axis, the ending month of the group of the window is indicated in the label. Significant correlations are highlighted in red.
